# Supplementary material
Source: publisher figshare collection journal article supplement (https://acs.figshare.com/ndownloader/files/8413022)
Supplement: Supplementary file 1 [file 8413022]

Compound_ID,SMILES
1,NC1=NC=NC(NC2=CC=CC=C2)=N1
2,NC1=NC=CC(NC2=CC=CC=C2)=N1
3,NC1=NC=C(F)C(NC2=CC=CC=C2)=N1
4,NC1=NC=C(Cl)C(NC2=CC=CC=C2)=N1
5,CN(C1=NC=CC=C1CNC1=C(C=NC(NC2=CC=C3NC(=O)CC3=C2)=N1)C(F)(F)F)S(C)(=O)=O
6,ClC1=CN=CN=C1NC1=CC2=C(NC(=O)C2)C=C1
7,ClC1=CN=C(NCC2=CC=CN=C2)N=C1NC1=CC=C2NC(=O)CC2=C1
